# Supplementary material
Source: ML conference proceedings conference paper supplement (https://proceedings.neurips.cc/paper_files/paper/2020/hash/f73b76ce8949fe29bf2a537cfa420e8f-Abstract.html)
Supplement: Supplementary file [file f73b76ce8949fe29bf2a537cfa420e8f-Supplemental.pdf]

---

# Uncertainty-Aware Learning for Zero-Shot Semantic Segmentation —Supplementary Material—

---

## 1 Bayesian Regression for DICE Coefficient.

The L-1 regression problem can be interpreted as maximum likelihood with a Laplacian error model.

$$P(t_i|x_i, \mathcal{L}) = \frac{1}{2\sigma(x_i)} \exp\left(-\frac{|t_i - y(x_i)|}{\sigma(x_i)}\right) \quad (1)$$

where  $x_i$  is the input,  $t_i$  is the target output,  $y(x_i)$  and  $\sigma(x_i)$  are the estimated mean and scale based on  $x_i$  respectively. By taking negative log on Eq. 1, we have,

$$-\ln P(t_i|x_i, \mathcal{L}) = \frac{1}{\sigma(x_i)} \cdot |t - y(x_i)| + \ln(\sigma(x_i)) + \ln(2) \quad (2)$$

which needs to be minimized. The last term  $\ln(2)$  is a constant, thus can be ignored. As a result we get the Bayesian regression loss with Laplacian error,

$$\mathcal{L} = \frac{1}{\sigma(x_i)} \cdot |t - y(x_i)| + \ln(\sigma(x_i)) \quad (3)$$

## 2 Effect of $\lambda$

|                  | PC-30   |        | PC-156  |        | ADE-75  |        |
|------------------|---------|--------|---------|--------|---------|--------|
|                  | Overall | Unseen | Overall | Unseen | Overall | Unseen |
| $\lambda = 0.0$  | 36.0    | 17.1   | 23.1    | 12.1   | 25.3    | 13.9   |
| $\lambda = 0.05$ | 36.5    | 18.6   | 23.8    | 13.3   | 25.8    | 15.2   |
| $\lambda = 0.5$  | 36.5    | 17.9   | 23.9    | 13.6   | 25.6    | 14.5   |
| $\lambda = 1.0$  | 36.4    | 17.6   | 23.8    | 12.4   | 25.3    | 13.8   |

Table 1: Effect of  $\lambda$  in Eq.(2) of the paper. As we can see, a too large or too small value for  $\lambda$  decreases the unseen-class performance.
